# Supplementary material for: Sulfonated Polysulfone/TiO2(B) Nanowires Composite Membranes as Polymer Electrolytes in Fuel Cells
Source: MDPI journal article supplement (doi:10.3390/polym13122030), 2021-06-21
Supplement: s1 [file s1]

### Supplementary material

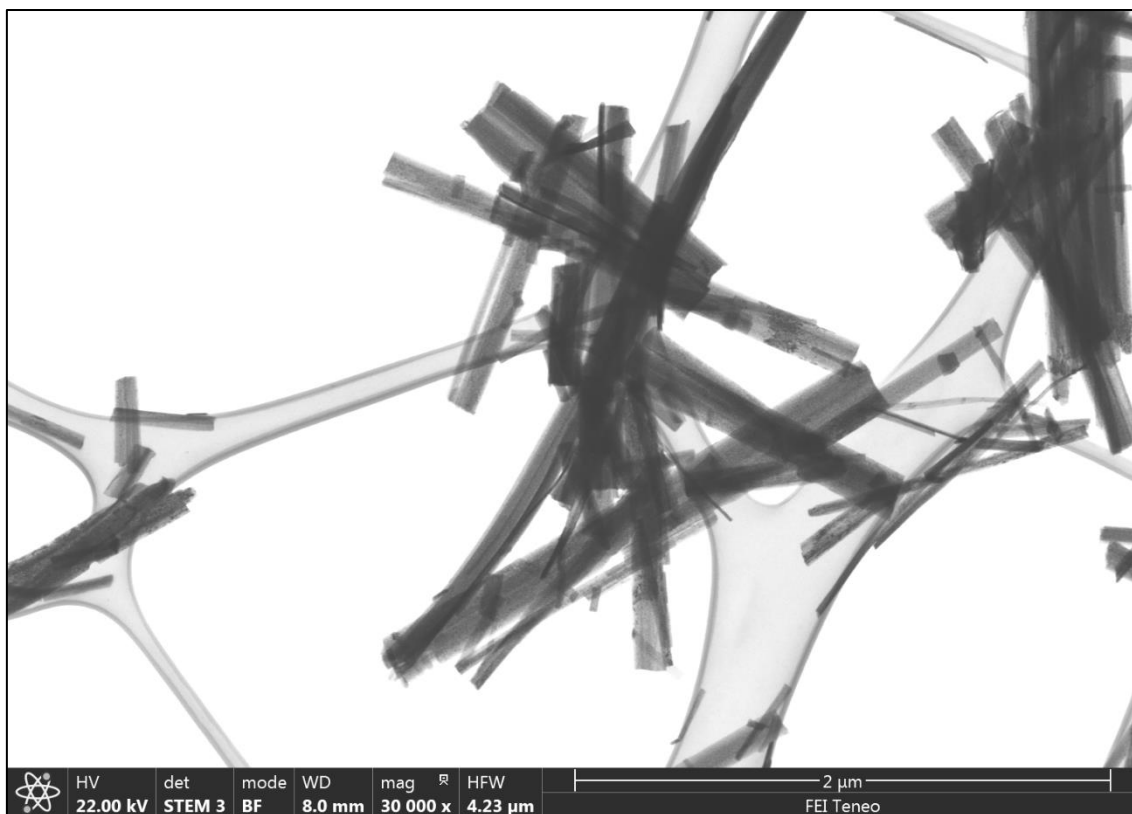

Figure S1. STEM image of  $\text{TiO}_2$  (B) nanowires synthesized by the hydrothermal method and employed for sPSU / x%  $\text{TiO}_2$  (B) membranes.

Table S1. FTIR peak assignment for sPSU/2% $\text{TiO}_2$ (B) composite membrane.

| Wave number ( $\text{cm}^{-1}$ ) | Vibration type | Assignment              |
|----------------------------------|----------------|-------------------------|
| 400-700                          | Stretching     | Ti-O-Ti                 |
| 925                              | Stretching     | Ti-OH                   |
| 1024                             | Stretching     | - $\text{SO}_3\text{H}$ |
| 1630                             | Bending        | -OH                     |
| 3200-3600                        | Stretching     | $\delta\text{OH}$       |
